# Supplementary material for: Evaluation of Electrospun Self-Supporting Paper-Like Fibrous Membranes as Oil Sorbents
Source: MDPI journal article supplement (doi:10.3390/membranes11070515), 2021-07-08
Supplement: s1 [file s1]

Supplementary Information

# Evaluation of Electrospun Self-Supporting Paper-Like Fibrous Membranes as Oil Sorbents

Adele Folino <sup>1</sup>, Claudia Triolo <sup>2</sup>, Beatrix Petrovičová <sup>2</sup>, Fabiolo Pantò <sup>3</sup>, Demetrio A. Zema <sup>1,\*</sup>  
and Saveria Santangelo <sup>2,\*</sup>

<sup>1</sup> Department of Agriculture, Mediterranean University of Reggio Calabria, Località Feo di Vito, I-89122 Reggio Calabria, Italy; adelefolino@alice.it

<sup>2</sup> Department of Civil, Energy, Environmental and Materials Engineering. (DICEAM), Mediterranean University, Località Feo di Vito, I-89122 Reggio Calabria, Italy; claudia.triolo@unirc.it (C.T.); beatrix.petrovicova@unirc.it (B.P.)

<sup>3</sup> Institute of Advanced Technologies for Energy (ITAE), Italian National Research Council (CNR), I-98126 Messina, Italy; fabiola.panto@itaecnr.it

\* Correspondence: dzema@unirc.it (D.A.Z.); saveria.santangelo@unirc.it (S.S.)

**Citation:** Folino, A.; Triolo, C.; Petrovičová, B.; Pantò, F.; Zema, D.A.; Santangelo, S. Evaluation of Electrospun Self-Supporting Paper-Like Fibrous Membranes as Oil Sorbents. *Membranes* **2021**, *11*, 515. <https://doi.org/10.3390/membranes11070515>

Academic Editor: Scott M. Husson

Received: 22 June 2021

Accepted: 6 July 2021

Published: 8 July 2021

**Publisher's Note:** MDPI stays neutral with regard to jurisdictional claims in published maps and institutional affiliations.

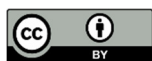

**Copyright:** © 2021 by the authors. Licensee MDPI, Basel, Switzerland. This article is an open access article distributed under the terms and conditions of the Creative Commons Attribution (CC BY) license (<http://creativecommons.org/licenses/by/4.0/>).

**Table S1.** Main characteristics and results reported in the studies on PAN membranes used as oil sorbents.

| Ref.                                                  | ENM type                                       | Spinnable Solution                                    | Spinning Condition             | Heat Treatment                                | NF Diameter and SSA                               | Adsorption Method  | Oil Type                 | Oil Recovery [g g <sup>-1</sup> ] |  |  |  |  |  |            |     |
|-------------------------------------------------------|------------------------------------------------|-------------------------------------------------------|--------------------------------|-----------------------------------------------|---------------------------------------------------|--------------------|--------------------------|-----------------------------------|--|--|--|--|--|------------|-----|
| [1]                                                   | MCNFF                                          | 0.8g PAN + 10g DMF                                    | 1.5 mL/h<br>25 kV<br>15 cm     | 280 °C/2h/air                                 | n.a.<br>16.0 m <sup>2</sup> g <sup>-1</sup>       | Immersion          | Ethanol                  | 17.5                              |  |  |  |  |  |            |     |
|                                                       |                                                |                                                       |                                |                                               |                                                   |                    | Pump oil                 | 37.0                              |  |  |  |  |  |            |     |
|                                                       |                                                |                                                       |                                |                                               |                                                   |                    | Mineral oil              | 27.7                              |  |  |  |  |  |            |     |
|                                                       |                                                |                                                       |                                |                                               |                                                   |                    | Silicone oil             | 78.5                              |  |  |  |  |  |            |     |
|                                                       |                                                |                                                       |                                |                                               |                                                   |                    | Corn oil                 | 42.8                              |  |  |  |  |  |            |     |
|                                                       |                                                | 0.8g PAN + 10g DMF + 0.5g PTA                         |                                | 280 nm<br>20.9 m <sup>2</sup> g <sup>-1</sup> | Immersion                                         | Ethanol            | 62.6                     |                                   |  |  |  |  |  |            |     |
|                                                       |                                                |                                                       |                                |                                               |                                                   | Pump oil           | 73.8                     |                                   |  |  |  |  |  |            |     |
|                                                       |                                                |                                                       |                                |                                               |                                                   | Mineral oil        | 73.8                     |                                   |  |  |  |  |  |            |     |
|                                                       |                                                |                                                       |                                |                                               |                                                   | Silicone oil       | 64.0                     |                                   |  |  |  |  |  |            |     |
|                                                       |                                                |                                                       |                                |                                               |                                                   | Corn oil           | 138.4                    |                                   |  |  |  |  |  |            |     |
|                                                       |                                                | Filter separation                                     | Petroleum/water mixture        | 94.0                                          |                                                   |                    |                          |                                   |  |  |  |  |  |            |     |
|                                                       |                                                |                                                       | Oil-water mixture              | 100                                           |                                                   |                    |                          |                                   |  |  |  |  |  |            |     |
| [2]                                                   | PAN–silica NFs                                 | 7% PAN+ 15:1 DMF:AA + 0.5% TEOS                       | 0.54-0.6 mL/h<br>0.6-0.8 kV/cm | 280 °C/2h/air<br>900 °C/2h/N <sub>2</sub>     | 200-300 nm<br>41.8 m <sup>2</sup> g <sup>-1</sup> | Gravity separation | Pump oil                 | 60*                               |  |  |  |  |  |            |     |
|                                                       |                                                |                                                       |                                |                                               |                                                   |                    | Silicon oil              | 100*                              |  |  |  |  |  |            |     |
|                                                       |                                                |                                                       |                                |                                               |                                                   |                    | Olive oil                | 98*                               |  |  |  |  |  |            |     |
|                                                       |                                                |                                                       |                                |                                               |                                                   |                    | Bean oil/water           | 30*                               |  |  |  |  |  |            |     |
|                                                       |                                                |                                                       |                                |                                               |                                                   |                    | Sunflower seed oil/water | 22*                               |  |  |  |  |  |            |     |
|                                                       |                                                |                                                       |                                |                                               |                                                   |                    |                          |                                   |  |  |  |  |  | Engine oil | 21* |
|                                                       |                                                |                                                       |                                |                                               |                                                   |                    |                          |                                   |  |  |  |  |  | Pump oil   | 16* |
| Diesel                                                | 11*                                            |                                                       |                                |                                               |                                                   |                    |                          |                                   |  |  |  |  |  |            |     |
| Peanut oil                                            | 15*                                            |                                                       |                                |                                               |                                                   |                    |                          |                                   |  |  |  |  |  |            |     |
| Engine oil                                            | 22*                                            |                                                       |                                |                                               |                                                   |                    |                          |                                   |  |  |  |  |  |            |     |
| Pump oil                                              | 17*                                            |                                                       |                                |                                               |                                                   |                    |                          |                                   |  |  |  |  |  |            |     |
| Diesel                                                | 13*                                            |                                                       |                                |                                               |                                                   |                    |                          |                                   |  |  |  |  |  |            |     |
| Peanut oil                                            | 19*                                            |                                                       |                                |                                               |                                                   |                    |                          |                                   |  |  |  |  |  |            |     |
| [3]                                                   | SiO <sub>2</sub> @MUF/PAN                      | 10% 3:1 PAN: MUF + 100 g DMF                          | 1 mL/h<br>20 kV<br>15 cm       | 110 °C/2h/air                                 | 120 nm<br>20.89 m <sup>2</sup> g <sup>-1</sup>    | Immersion          | Engine oil               | 22.7*                             |  |  |  |  |  |            |     |
|                                                       |                                                |                                                       |                                |                                               |                                                   |                    | Pump oil                 | 18.5*                             |  |  |  |  |  |            |     |
|                                                       |                                                |                                                       |                                |                                               |                                                   |                    | Diesel                   | 13.1*                             |  |  |  |  |  |            |     |
|                                                       |                                                |                                                       |                                |                                               |                                                   |                    | Peanut oil               | 19.1*                             |  |  |  |  |  |            |     |
|                                                       |                                                |                                                       |                                |                                               |                                                   |                    | Engine oil               | 14.5*                             |  |  |  |  |  |            |     |
|                                                       |                                                | 10% 3:1 PAN: MUF + 100 g DMF + 0.45% SiO <sub>2</sub> |                                |                                               | 110 nm<br>21.47 m <sup>2</sup> g <sup>-1</sup>    |                    | Pump oil                 | 14.5*                             |  |  |  |  |  |            |     |
|                                                       |                                                |                                                       |                                |                                               |                                                   |                    | Diesel                   | 9.5*                              |  |  |  |  |  |            |     |
|                                                       |                                                |                                                       |                                |                                               |                                                   |                    | Peanut oil               | 17*                               |  |  |  |  |  |            |     |
|                                                       |                                                |                                                       |                                |                                               |                                                   |                    | Engine oil               | 14.5*                             |  |  |  |  |  |            |     |
|                                                       |                                                |                                                       |                                |                                               |                                                   |                    | Pump oil                 | 14.5*                             |  |  |  |  |  |            |     |
| 10% 3:1 PAN: MUF + 100 g DMF + 0.90% SiO <sub>2</sub> | 149 nm<br>23.45 m <sup>2</sup> g <sup>-1</sup> | Diesel                                                | 9.5*                           |                                               |                                                   |                    |                          |                                   |  |  |  |  |  |            |     |
|                                                       |                                                | Peanut oil                                            | 17*                            |                                               |                                                   |                    |                          |                                   |  |  |  |  |  |            |     |
|                                                       |                                                | Engine oil                                            | 14.5*                          |                                               |                                                   |                    |                          |                                   |  |  |  |  |  |            |     |
|                                                       |                                                | Pump oil                                              | 14.5*                          |                                               |                                                   |                    |                          |                                   |  |  |  |  |  |            |     |
|                                                       |                                                | Diesel                                                | 9.5*                           |                                               |                                                   |                    |                          |                                   |  |  |  |  |  |            |     |
| 10% 3:1 PAN: MUF + 100 g DMF + 1.80% SiO <sub>2</sub> | 137 nm<br>7.74 m <sup>2</sup> g <sup>-1</sup>  | Peanut oil                                            | 17*                            |                                               |                                                   |                    |                          |                                   |  |  |  |  |  |            |     |

\*estimated data.

## Syntheses

The procedure followed for the synthesis of the sorbent membranes is sketched in Figure S1. The spinnable solution to produce PAN-based fibrous membranes was prepared by dissolving 6.5 wt% PAN in DMF. PAN/PMMA/DMF solutions with different PAN:PMMA mass ratios were also prepared, keeping total content of the polymer constant. PMMA acted as a sacrificial pore-forming agent. Electrospinning was carried out in air by using 20-mL syringe with a 4-mm long and 0.8-mm gauge stainless steel needle. The PAN/DMF and PAN/PMMA/DMF solutions were fed at volumetric rates of 1.41 mL h<sup>-1</sup> and 1.00 mL h<sup>-1</sup>, respectively. In the former case, applied voltage was 17.2 kV; in the latter, it was 15.0 kV. Collection distance was kept constant at 11 cm. The strong jet elongation made most DMF to evaporate during the electrospinning [4]; the residual solvent was removed via drying over night at room temperature. Then, the as-spun PAN and PAN/PMMA membranes were peeled-off from the collector and thermally treated.

Stabilisation was carried in static air under the same conditions for all the investigated membranes; carbonization was operated at flow of  $100 \text{ cc min}^{-1} \text{ N}_2$ . The pure PAN membranes were carbonized at different temperatures (500, 650 or  $800^\circ\text{C}$ ) in order to evaluate the effect of the carbonization temperature ( $T_c$ ) on their microstructure, mechanical robustness and adsorption efficiency. For the membranes derived from the blends PAN/PMMA,  $T_c$  was set at  $650^\circ\text{C}$ . At this temperature, pure PAN membrane showed water repellence and the highest oil recovery (see main text).

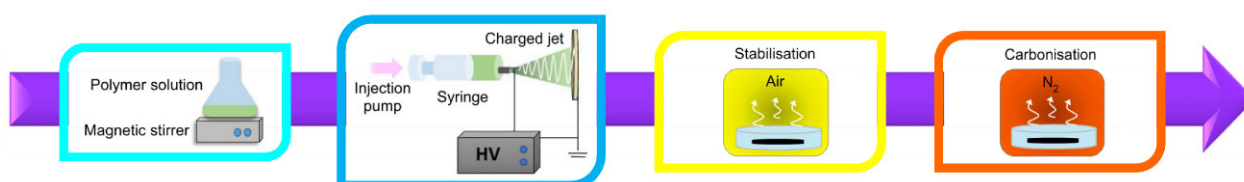

**Figure S1.** Sketch of the procedure followed to for the synthesis of the sorbent membranes.

#### Setup for contact angle measurements

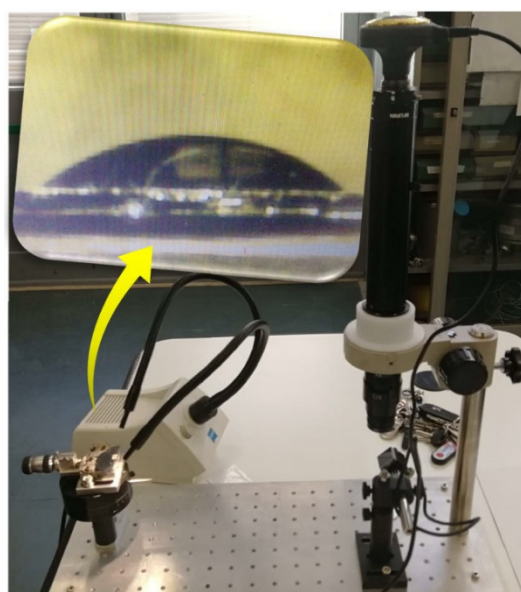

**Figure S2.** Experimental setup to measure the contact angle of a water droplet on surface of the produced membranes. A sample-holder, mounted on a rotating mechanical support, was used. A micrometer movement system finely controlled the position of the droplet, released via a calibrated syringe. A CCD camera mounted on an optical microscope, with a long focal distance, acquired the optical images of the droplets. Inset: image of a droplet caught at the optical microscope.

### Adsorption experiments and tested liquids

**Table S2.** Main physical properties of the tested liquids.

| Liquid             | Mass density<br>(g cm <sup>-3</sup> ) | Ref. | Viscosity coefficient<br>(mPa·s) | Ref. | Surface tension<br>(mN/m) | Ref. |
|--------------------|---------------------------------------|------|----------------------------------|------|---------------------------|------|
| Water              | 1.000                                 |      | 0.002                            |      | 72.8                      |      |
| Olive oil          | 0.908                                 | [5]  | 74.1                             | [5]  | 31.9                      | [5]  |
| Sunflower seed oil | 0.917                                 | [6]  | 48.8                             | [7]  | 34.0                      | [6]  |
| Motor oil          | 0.880                                 | [6]  | 162.3                            | [8]  | 31.7                      | [6]  |

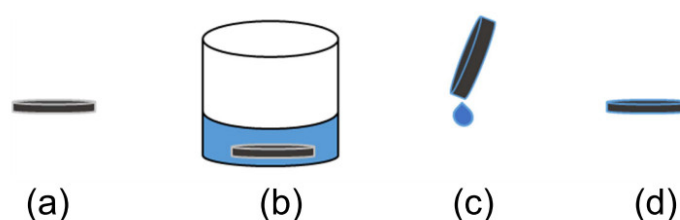

**Figure S3.** Sketch of the procedure followed to estimate the liquid recovery efficiency by immersion: after weighing, the membrane (a) is immersed in the liquid (b); after draining (c), the liquid-saturated membrane (d) is weighed.

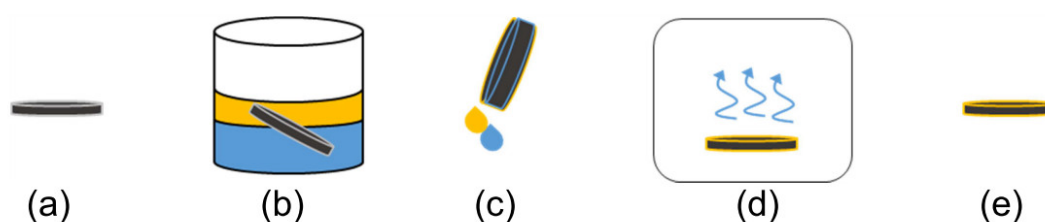

**Figure S4.** Sketch of the procedure followed to estimate the recovery efficiency in the case of the bi-phasic liquid: after weighing, the membrane (a) is immersed in the mixture oil/water (b); after draining (c), the liquid-saturated membrane is transferred in oven to remove water (d) and finally weighed (e).

## Effect of thermal treatments

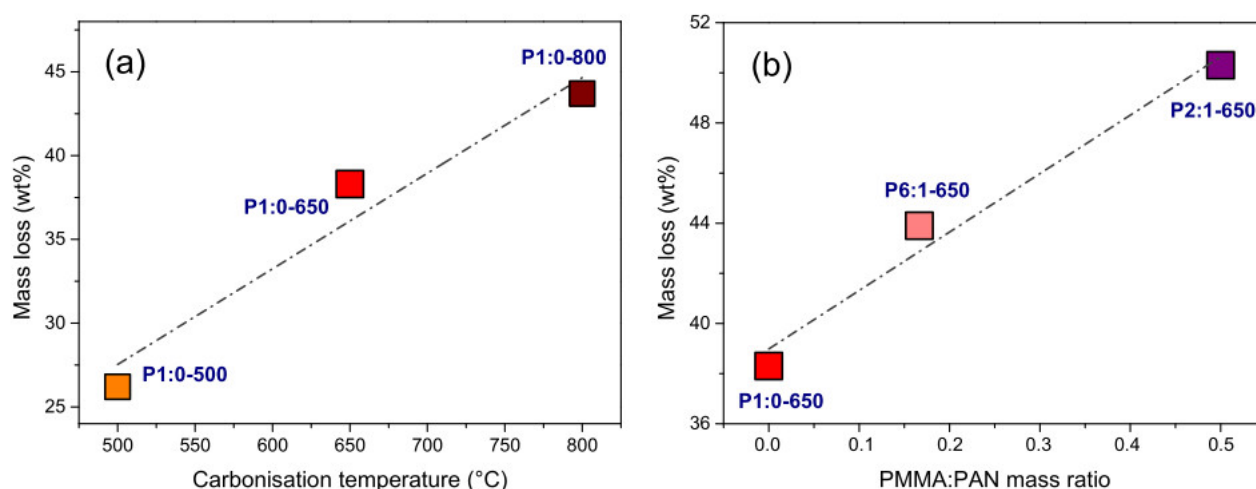

**Figure S5.** Mass loss during carbonisation of (a) PAN-based membranes at different temperatures and (b) PAN/PMMA-derived membranes with different PMMA: PAN ratios at 650 °C.

## Membrane nanostructure

**Table S3.** Results of MRS and XRD analyses. MRS: D/G intensity ratio ( $I_D/I_G$ ), calculated band amplitude ratio, as in the case of large disorder, and resulting average size of the graphite-like domains ( $L_c$ ). XRD: angular position of the (002) reflection peak ( $\theta_{002}$ ) and corresponding interplanar spacing, calculated, using the Bragg's law, as  $d_{002} = \lambda/2\sin\theta$ , where  $\lambda$  (0.15451 nm) is the wavelength of Cu-K $\alpha$  radiation source and  $\theta_{002}$  is the diffraction angle; its decrease is indicative of the diminishing of heteroatoms intercalated between planes in the graphite-like domains.

| Membrane | MRS         |               |                                   | XRD                     |                   |
|----------|-------------|---------------|-----------------------------------|-------------------------|-------------------|
|          | $I_D/I_G$   | $L_c$<br>(nm) | $\omega_G$<br>(cm <sup>-1</sup> ) | $\theta_{002}$<br>(deg) | $d_{002}$<br>(nm) |
| P1:0-500 | 1.60 ± 0.02 | 2.75 ± 0.03   | 1578.4 ± 0.4                      | 24.1 ± 0.4              | 0.37 ± 0.01       |
| P1:0-650 | 1.55 ± 0.02 | 2.84 ± 0.04   | 1581.0 ± 0.5                      | 24.6 ± 0.4              | 0.36 ± 0.01       |
| P1:0-800 | 1.52 ± 0.03 | 2.89 ± 0.05   | 1587.9 ± 0.6                      | 25.2 ± 0.4              | 0.35 ± 0.01       |
| P6:1-650 | 1.52 ± 0.02 | 2.89 ± 0.04   | 1584.7 ± 0.5                      |                         |                   |
| P2:1-650 | 1.46 ± 0.02 | 3.01 ± 0.04   | 1590.6 ± 0.5                      |                         |                   |

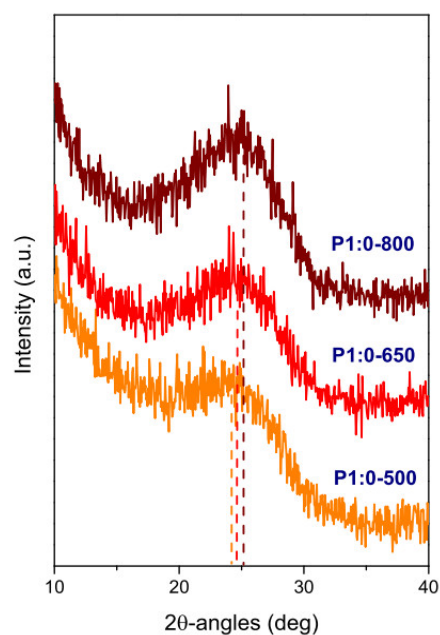

**Figure S6.** XRD patterns of PAN-derived membranes carbonised at different temperatures.

#### Adsorption experiments

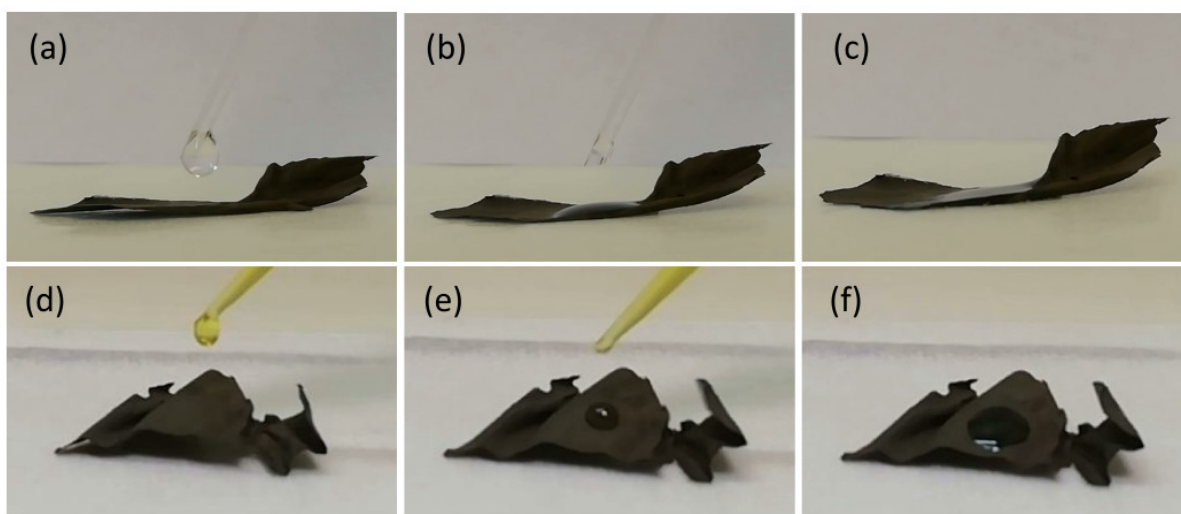

**Figure S7.** Spread of a drop of (a–c) water and (d–f) oil over membrane P1:0-500.

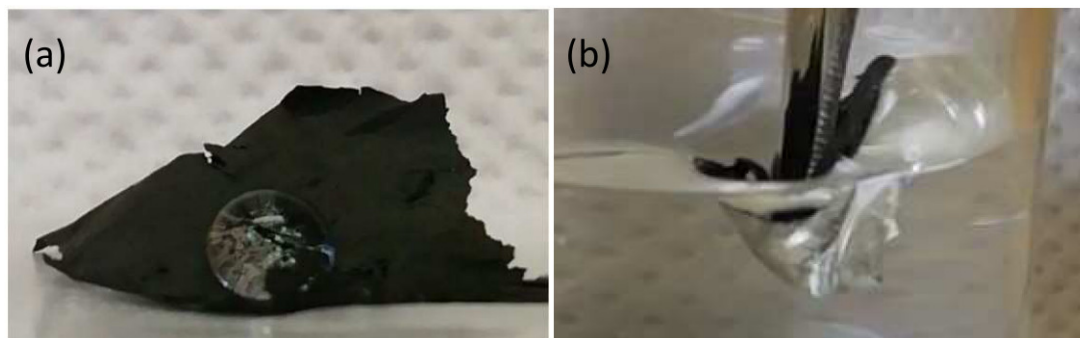

**Figure S8.** (a) A water drop over membrane P1:0-650. (b) Immersion of the membrane in water.

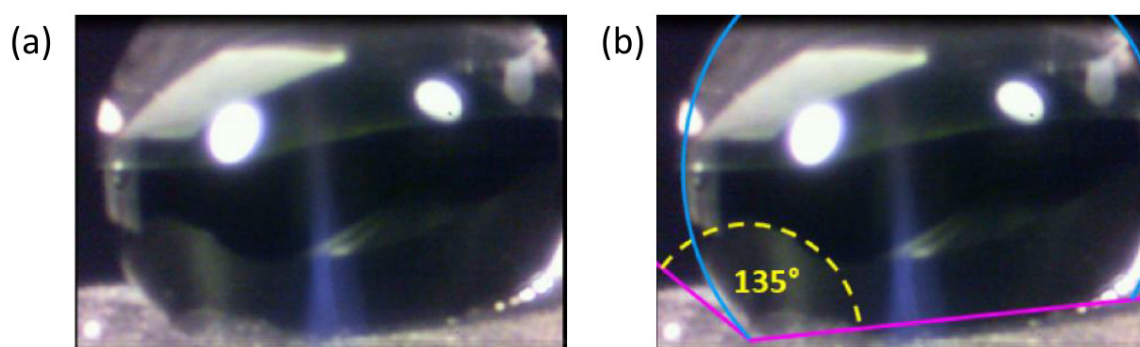

**Figure S9.** Water droplet contact angle measurement on membrane P1:0-650. (a) Droplet caught at the optical microscope; (b) scheme for the evaluation of the water contact angle.

**Table S4.** Recovery efficiencies measured in tests of immersion in water, olive oil (OO) and sunflower seed oil (SFO) and motor oil (MO).

| Sample Code | Water<br>(g g <sup>-1</sup> ) | OO<br>(g g <sup>-1</sup> ) | SFO<br>(g g <sup>-1</sup> ) | MO<br>(g g <sup>-1</sup> ) |
|-------------|-------------------------------|----------------------------|-----------------------------|----------------------------|
| P1:0-500    | 78.9 ± 3.2                    | 29.8 ± 1.2                 | 94.8 ± 3.8                  | 23.0 ± 1.0                 |
| P1:0-650    | 18.0 ± 0.8                    | 61.0 ± 2.5                 | 43.7 ± 1.8                  | 67.8 ± 2.8                 |
| P1:0-800    | 11.5 ± 0.5                    | 48.8 ± 2.0                 | 53.6 ± 2.2                  | 49.9 ± 2.0                 |
| P6:1-650    | 2.5 ± 0.1                     | 4.3 ± 0.2                  | 4.4 ± 0.2                   | 14.7 ± 0.6                 |
| P2:1-650    | 87.6 ± 3.5                    | 24.9 ± 1.0                 | 21.6 ± 0.9                  | 17.8 ± 0.8                 |

**Table S5.** Water and oil recovery efficiencies ( $R_w$  and  $R_o$ ) measured by immersing the sorbent membrane in 1:4 (v:v) oil/water mixture (spill tests) and corresponding oil/water selectivity ( $S_{o/w}$ ).

| Sample code | OO                            |                               |            | SFO                           |                               |            | MO                            |                               |             |
|-------------|-------------------------------|-------------------------------|------------|-------------------------------|-------------------------------|------------|-------------------------------|-------------------------------|-------------|
|             | $R_w$<br>(g g <sup>-1</sup> ) | $R_o$<br>(g g <sup>-1</sup> ) | $S_{o/w}$  | $R_w$<br>(g g <sup>-1</sup> ) | $R_o$<br>(g g <sup>-1</sup> ) | $S_{o/w}$  | $R_w$<br>(g g <sup>-1</sup> ) | $R_o$<br>(g g <sup>-1</sup> ) | $S_{o/w}$   |
| P1:0-500    | 2.3 ± 0.1                     | 38.6 ± 1.6                    | 16.8 ± 1.7 | 5.0 ± 0.2                     | 38.4 ± 1.6                    | 7.7 ± 0.7  | 3.2 ± 0.2                     | 29.2 ± 1.2                    | 9.1 ± 0.9   |
| P1:0-650    | 26.3 ± 1.1                    | 100.3 ± 4.1                   | 3.8 ± 0.3  | 15.6 ± 0.7                    | 89.0 ± 3.6                    | 5.7 ± 0.5  | 43.2 ± 1.8                    | 68.7 ± 2.8                    | 1.6 ± 0.1   |
| P1:0-800    | 3.7 ± 0.2                     | 37.2 ± 1.5                    | 10.1 ± 0.9 | 2.5 ± 0.1                     | 32.2 ± 1.3                    | 12.9 ± 1.3 | 8.1 ± 0.4                     | 22.5 ± 0.9                    | 2.8 ± 0.2   |
| P6:1-650    | 0.3 ± 0.1                     | 3.7 ± 0.2                     | 12.6 ± 2.8 | 0.2 ± 0.1                     | 5.5 ± 0.3                     | 28.0 ± 8.0 | 0.2 ± 0.1                     | 8.5 ± 0.4                     | 35.5 ± 10.1 |
| P2:1-650    | 1.0 ± 0.1                     | 73.5 ± 3.0                    | 73.5 ± 8.9 | 0.8 ± 0.1                     | 54.8 ± 2.2                    | 68.5 ± 9.0 | 0.8 ± 0.1                     | 12.5 ± 0.5                    | 15.6 ± 2.1  |

### Correlations with properties of the tested oils

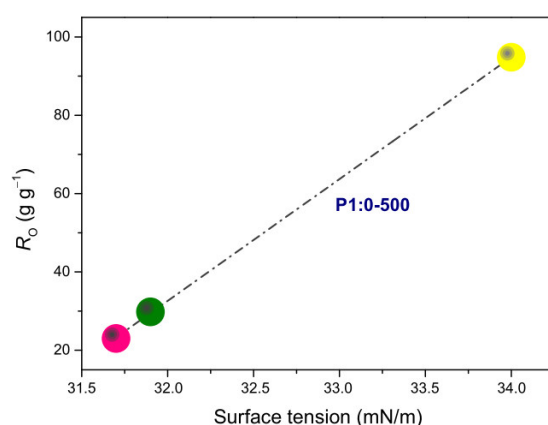

**Figure S10.** Relation between recovery efficiency and oil surface tension in adsorption tests of membrane P1:0-500.

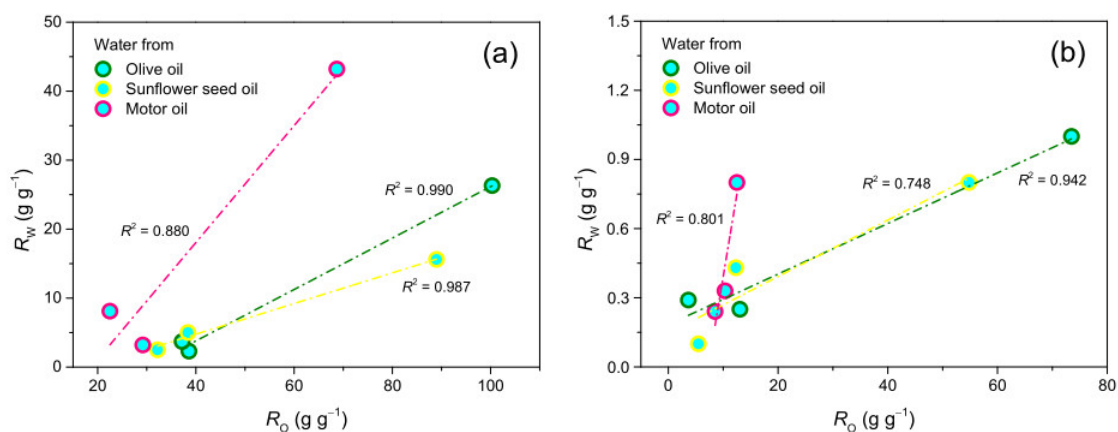

**Figure S11.** Plots of water- vs oil-recovery efficiency for (a) PAN-membranes carbonised at different temperatures and (b) PAN/PMMA-membranes with different (from 6:1 to 2:1) PAN:PMMA mass ratio carbonised at 650 °C.

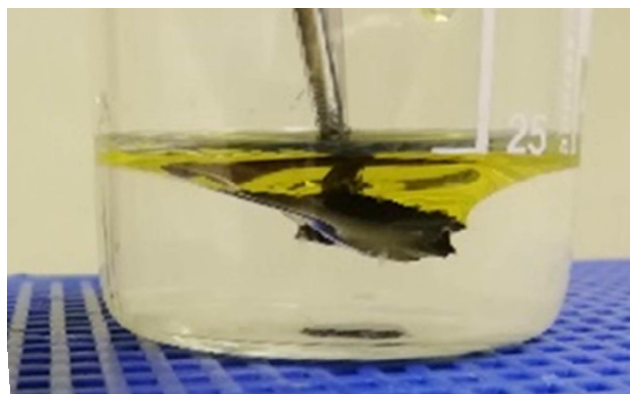

**Figure S12.** Image of the membrane immersion in the bi-phasic oil/water mixture in the spill tests.

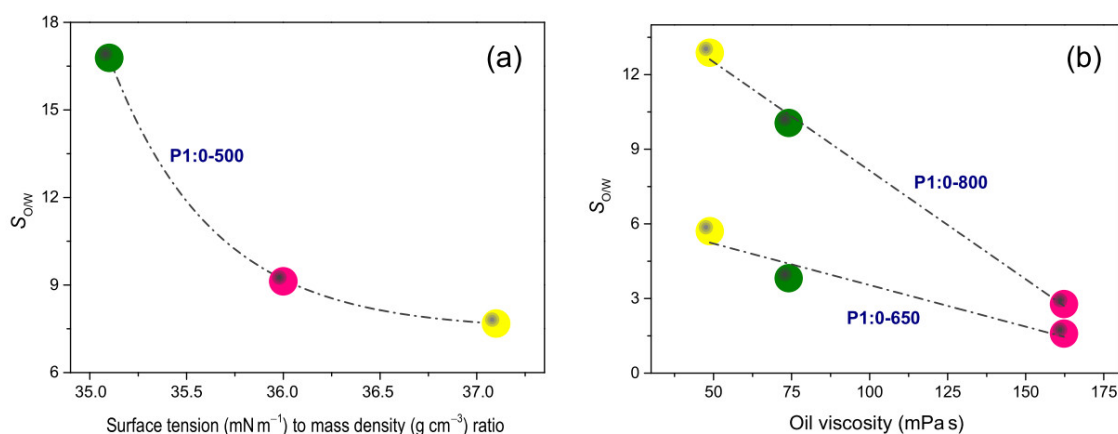

**Figure S13.** Dependence of the oil/water selectivity ( $S_{O/W}$ ) of the PAN-derived membranes on the (a) strength of capillary action, as monitored by the oil surface tension to mass density ratio, and (b) oil viscosity.

## References

1. Liu, H.; Cao, C.-Y.; Wei, F.-F.; Huang, P.-P.; Sun, Y.-B.; Jiang, L.; Song, W.-G. Flexible macroporous carbon nanofiber film with high oil adsorption capacity. *J. Mater. Chem. A* **2014**, *2*, 3557–3562.
2. Tai, M.H.; Tan, B.Y.L.; Juay, J.; Sun, D.D.; Leckie, J.O. A self-assembled superhydrophobic electrospun carbon-silica nanofiber sponge for selective removal and recovery of oils and organic solvents. *Chem. - A Eur. J.* **2015**, *21*, 5395–5402.
3. Yuan, J.; Gao, R.; Wang, Y.; Cao, W.; Yun, Y.; Dong, B.; Dou, J. A novel hydrophobic adsorbent of electrospun SiO<sub>2</sub>@MUF/PAN nanofibrous membrane and its adsorption behaviour for oil and organic solvents. *J. Mater. Sci.* **2018**, *53*, 16357–16370.

4. Bognitzki, M.; Czado, W.; Frese, T.; Schaper, A.; Hellwig, M.; Steinhart, M.; Greiner, A.; Wendorff, J.H. Nanostructured Fibers via Electrospinning. *Adv. Mater.* **2001**, *13*, 70–72.
5. Shin, C.; Chase, G.G. Water-in-Oil Coalescence in Micro-Nanofiber Composite Filters. *AIChE J.* **2004**, *50*, 343–350.
6. Esteban, B.; Riba, J.R.; Baquero, G.; Puig, R.; Rius, A. Characterization of the surface tension of vegetable oils to be used as fuel in diesel engines. *Fuel* **2012**, *102*, 231–238.
7. Diamante, L.M.; Lan, T. Absolute Viscosities of Vegetable Oils at Different Temperatures and Shear Rate Range of 64.5 to 4835 s<sup>−1</sup>. **2014**.
8. Qiao, Y.; Zhao, L.; Li, P.; Sun, H.; Li, S. Electrospun polystyrene/polyacrylonitrile fiber with high oil sorption capacity. *J. Reinf. Plast. Compos.* **2014**, *33*, 1849–1858.
